# Supplementary material for: PhosphoDisco: A Toolkit for Co-regulated Phosphorylation Module Discovery in Phosphoproteomic Data
Source: PubMed Central journal article supplement (PMC10416063; doi:10.1016/j.mcpro.2023.100596), 2023-06-30

A

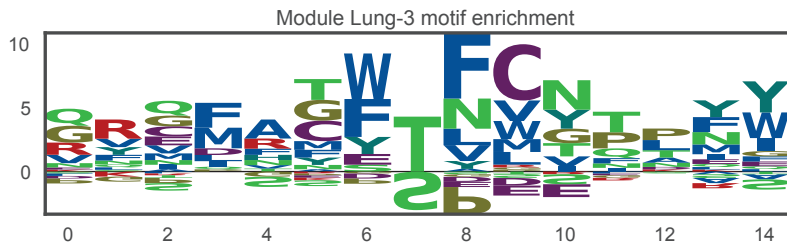

B

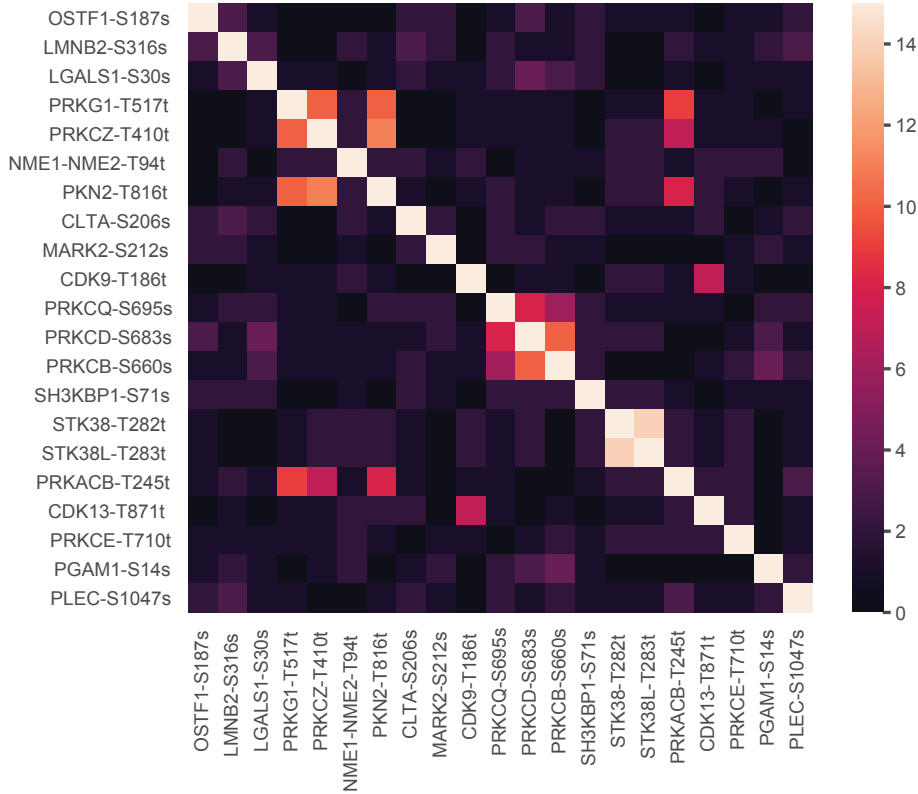

C

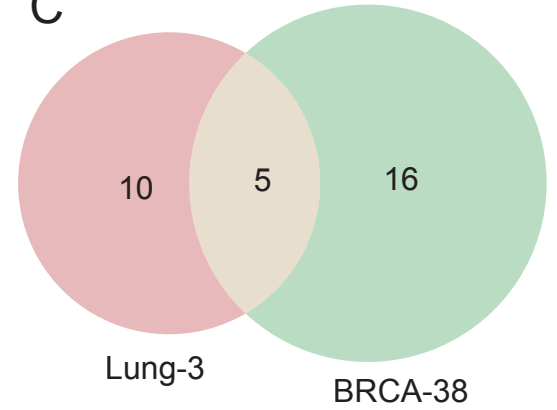

D

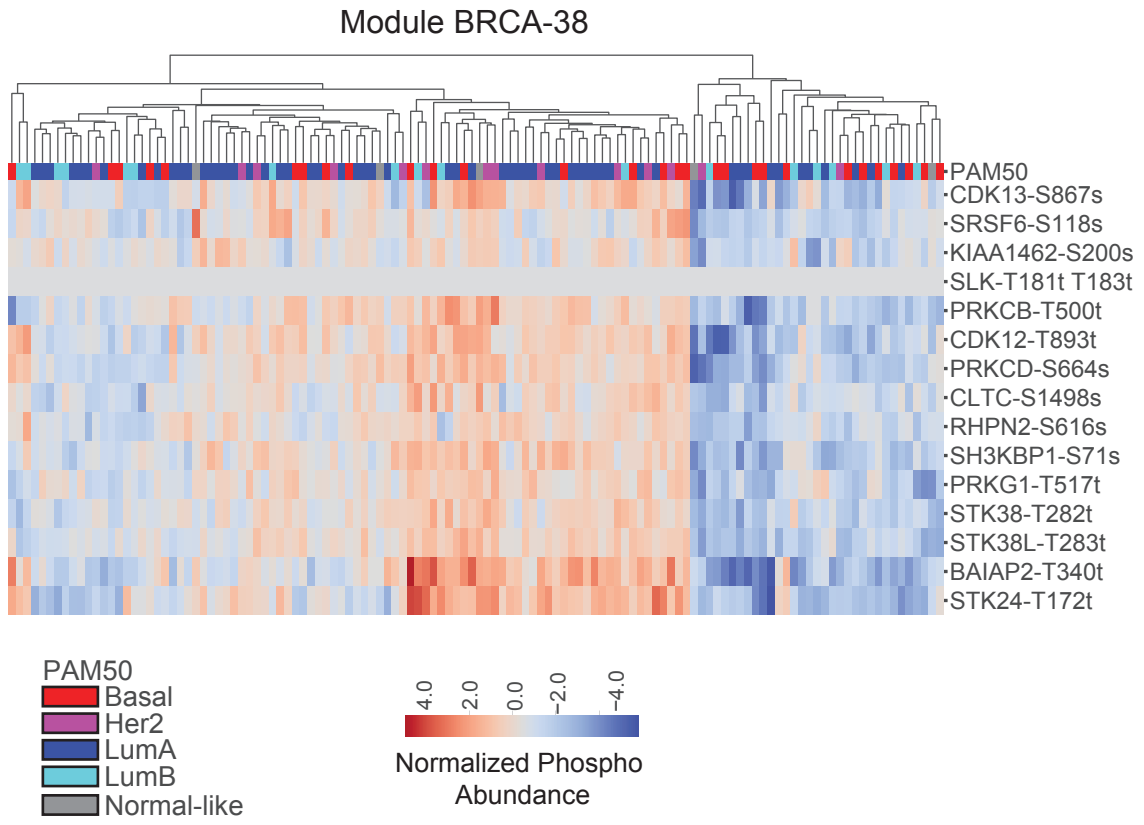

Supplement: mmc7.pdf [file mmc7.pdf]
